# Supplementary material for: Maternal haplotype diversity and phylogenetic relationships of Damascus, Kilis, Hatay, and Kil goat breeds: insight from mtDNA D-loop sequences in the Fertile Crescent
Source: Copernicus journal article supplement (doi:10.5194/aab-68-607-2025), 2025-10-22
Supplement: Supplementary file 1 [file Table S1_Supplementary data.xlsx]

## Sheet: Sayfa1
Table S1. Information on Goat Accessions Subjected to Phylogenetic Analysis
Genius	Species	Taxonomy ID	Breed	Country	Province	District	Animal code	Accession number	Haplogroups	Collected by	Collection date	Data
Capra	Capra hircus	9925	Damascus (also known as "Shami")	Türkiye	Hatay	Reyhanlı	DMS1	PV068375	Haplogroup A	Zühal Gündüz	2016-04-15	Sanger dideoxy sequencing
Capra	Capra hircus	9925	Damascus (also known as "Shami")	Türkiye	Hatay	Reyhanlı	DMS2	PV068376	Haplogroup A	Zühal Gündüz	2016-04-15	Sanger dideoxy sequencing
Capra	Capra hircus	9925	Damascus (also known as "Shami")	Türkiye	Hatay	Reyhanlı	DMS3	PV068377	Haplogroup A	Zühal Gündüz	2016-04-15	Sanger dideoxy sequencing
Capra	Capra hircus	9925	Damascus (also known as "Shami")	Türkiye	Hatay	Reyhanlı	DMS4	PV068378	Haplogroup A	Zühal Gündüz	2016-04-15	Sanger dideoxy sequencing
Capra	Capra hircus	9925	Damascus (also known as "Shami")	Türkiye	Hatay	Reyhanlı	DMS5	PV068379	Haplogroup A	Zühal Gündüz	2016-04-15	Sanger dideoxy sequencing
Capra	Capra hircus	9925	Damascus (also known as "Shami")	Türkiye	Hatay	Reyhanlı	DMS6	PV068380	Haplogroup A	Zühal Gündüz	2016-04-15	Sanger dideoxy sequencing
Capra	Capra hircus	9925	Damascus (also known as "Shami")	Türkiye	Hatay	Reyhanlı	DMS7	PV068381	Haplogroup A	Zühal Gündüz	2016-04-15	Sanger dideoxy sequencing
Capra	Capra hircus	9925	Damascus (also known as "Shami")	Türkiye	Hatay	Reyhanlı	DMS8	PV068382	Haplogroup A	Zühal Gündüz	2016-04-15	Sanger dideoxy sequencing
Capra	Capra hircus	9925	Damascus (also known as "Shami")	Türkiye	Hatay	Reyhanlı	DMS10	PV068383	Haplogroup A	Zühal Gündüz	2016-04-15	Sanger dideoxy sequencing
Capra	Capra hircus	9925	Damascus (also known as "Shami")	Türkiye	Hatay	Reyhanlı	DMS11	PV068384	Haplogroup A	Zühal Gündüz	2016-04-15	Sanger dideoxy sequencing
Capra	Capra hircus	9925	Damascus (also known as "Shami")	Türkiye	Hatay	Reyhanlı	DMS12	PV068385	Haplogroup A	Zühal Gündüz	2016-04-15	Sanger dideoxy sequencing
Capra	Capra hircus	9925	Damascus (also known as "Shami")	Türkiye	Hatay	Reyhanlı	DMS13	PV068386	Haplogroup A	Zühal Gündüz	2016-04-15	Sanger dideoxy sequencing
Capra	Capra hircus	9925	Damascus (also known as "Shami")	Türkiye	Hatay	Reyhanlı	DMS14	PV068387	Haplogroup A	Zühal Gündüz	2016-04-15	Sanger dideoxy sequencing
Capra	Capra hircus	9925	Damascus (also known as "Shami")	Türkiye	Hatay	Reyhanlı	DMS15	PV068388	Haplogroup A	Zühal Gündüz	2016-04-15	Sanger dideoxy sequencing
Capra	Capra hircus	9925	Damascus (also known as "Shami")	Türkiye	Hatay	Reyhanlı	DMS16	PV068389	Haplogroup A	Zühal Gündüz	2016-04-15	Sanger dideoxy sequencing
Capra	Capra hircus	9925	Damascus (also known as "Shami")	Türkiye	Hatay	Reyhanlı	DMS17	PV068390	Haplogroup G	Zühal Gündüz	2016-04-15	Sanger dideoxy sequencing
Capra	Capra hircus	9925	Damascus (also known as "Shami")	Türkiye	Hatay	Reyhanlı	DMS19	PV068391	Haplogroup G	Zühal Gündüz	2016-04-15	Sanger dideoxy sequencing
Capra	Capra hircus	9925	Damascus (also known as "Shami")	Türkiye	Hatay	Reyhanlı	DMS20	PV068392	Haplogroup A	Zühal Gündüz	2016-04-15	Sanger dideoxy sequencing
Capra	Capra hircus	9925	Damascus (also known as "Shami")	Türkiye	Hatay	Reyhanlı	DMS21	PV068393	Haplogroup A	Zühal Gündüz	2016-04-15	Sanger dideoxy sequencing
Capra	Capra hircus	9925	Damascus (also known as "Shami")	Türkiye	Hatay	Reyhanlı	DMS22	PV068394	Haplogroup A	Zühal Gündüz	2016-04-15	Sanger dideoxy sequencing
Capra	Capra hircus	9925	Hatay (also known as "Yayladağ")	Türkiye	Hatay	Yayladağ	HTY1	PV068395	Haplogroup A	Zühal Gündüz	2016-04-21	Sanger dideoxy sequencing
Capra	Capra hircus	9925	Hatay (also known as "Yayladağ")	Türkiye	Hatay	Yayladağ	HTY2	PV068396	Haplogroup A	Zühal Gündüz	2016-04-21	Sanger dideoxy sequencing
Capra	Capra hircus	9925	Hatay (also known as "Yayladağ")	Türkiye	Hatay	Yayladağ	HTY3	PV068397	Haplogroup A	Zühal Gündüz	2016-04-21	Sanger dideoxy sequencing
Capra	Capra hircus	9925	Hatay (also known as "Yayladağ")	Türkiye	Hatay	Yayladağ	HTY4	PV068398	Haplogroup A	Zühal Gündüz	2016-04-21	Sanger dideoxy sequencing
Capra	Capra hircus	9925	Hatay (also known as "Yayladağ")	Türkiye	Hatay	Yayladağ	HTY5	PV068399	Haplogroup A	Zühal Gündüz	2016-04-21	Sanger dideoxy sequencing
Capra	Capra hircus	9925	Hatay (also known as "Yayladağ")	Türkiye	Hatay	Yayladağ	HTY6	PV068400	Haplogroup A	Zühal Gündüz	2016-04-21	Sanger dideoxy sequencing
Capra	Capra hircus	9925	Hatay (also known as "Yayladağ")	Türkiye	Hatay	Yayladağ	HTY7	PV068401	Haplogroup A	Zühal Gündüz	2016-04-21	Sanger dideoxy sequencing
Capra	Capra hircus	9925	Hatay (also known as "Yayladağ")	Türkiye	Hatay	Yayladağ	HTY8	PV068402	Haplogroup A	Zühal Gündüz	2016-04-21	Sanger dideoxy sequencing
Capra	Capra hircus	9925	Hatay (also known as "Yayladağ")	Türkiye	Hatay	Yayladağ	HTY9	PV068403	Haplogroup A	Zühal Gündüz	2016-04-21	Sanger dideoxy sequencing
Capra	Capra hircus	9925	Hatay (also known as "Yayladağ")	Türkiye	Hatay	Yayladağ	HTY10	PV068404	Haplogroup A	Zühal Gündüz	2016-04-21	Sanger dideoxy sequencing
Capra	Capra hircus	9925	Hatay (also known as "Yayladağ")	Türkiye	Hatay	Yayladağ	HTY11	PV068405	Haplogroup A	Zühal Gündüz	2016-04-21	Sanger dideoxy sequencing
Capra	Capra hircus	9925	Hatay (also known as "Yayladağ")	Türkiye	Hatay	Yayladağ	HTY12	PV068406	Haplogroup A	Zühal Gündüz	2016-04-21	Sanger dideoxy sequencing
Capra	Capra hircus	9925	Hatay (also known as "Yayladağ")	Türkiye	Hatay	Yayladağ	HTY13	PV068407	Haplogroup A	Zühal Gündüz	2016-04-21	Sanger dideoxy sequencing
Capra	Capra hircus	9925	Hatay (also known as "Yayladağ")	Türkiye	Hatay	Yayladağ	HTY14	PV068408	Haplogroup A	Zühal Gündüz	2016-04-21	Sanger dideoxy sequencing
Capra	Capra hircus	9925	Hatay (also known as "Yayladağ")	Türkiye	Hatay	Yayladağ	HTY15	PV068409	Haplogroup A	Zühal Gündüz	2016-04-21	Sanger dideoxy sequencing
Capra	Capra hircus	9925	Hatay (also known as "Yayladağ")	Türkiye	Hatay	Yayladağ	HTY16	PV068410	Haplogroup G	Zühal Gündüz	2016-04-21	Sanger dideoxy sequencing
Capra	Capra hircus	9925	Hatay (also known as "Yayladağ")	Türkiye	Hatay	Yayladağ	HTY17	PV068411	Haplogroup A	Zühal Gündüz	2016-04-21	Sanger dideoxy sequencing
Capra	Capra hircus	9925	Hatay (also known as "Yayladağ")	Türkiye	Hatay	Yayladağ	HTY18	PV068412	Haplogroup A	Zühal Gündüz	2016-04-21	Sanger dideoxy sequencing
Capra	Capra hircus	9925	Hatay (also known as "Yayladağ")	Türkiye	Hatay	Yayladağ	HTY19	PV068413	Haplogroup A	Zühal Gündüz	2016-04-21	Sanger dideoxy sequencing
Capra	Capra hircus	9925	Hatay (also known as "Yayladağ")	Türkiye	Hatay	Yayladağ	HTY20	PV068414	Haplogroup A	Zühal Gündüz	2016-04-21	Sanger dideoxy sequencing
Capra	Capra hircus	9925	Hatay (also known as "Yayladağ")	Türkiye	Hatay	Yayladağ	HTY21	PV068415	Haplogroup A	Zühal Gündüz	2016-04-21	Sanger dideoxy sequencing
Capra	Capra hircus	9925	Hatay (also known as "Yayladağ")	Türkiye	Hatay	Yayladağ	HTY22	PV068416	Haplogroup A	Zühal Gündüz	2016-04-21	Sanger dideoxy sequencing
Capra	Capra hircus	9925	Hair (also known as "Kil")	Türkiye	Hatay	Belen	KIL1	PV068417	Haplogroup A	Zühal Gündüz	2016-04-15	Sanger dideoxy sequencing
Capra	Capra hircus	9925	Hair (also known as "Kil")	Türkiye	Hatay	Belen	KIL2	PV068418	Haplogroup A	Zühal Gündüz	2016-04-15	Sanger dideoxy sequencing
Capra	Capra hircus	9925	Hair (also known as "Kil")	Türkiye	Hatay	Belen	KIL3	PV068419	Haplogroup A	Zühal Gündüz	2016-04-15	Sanger dideoxy sequencing
Capra	Capra hircus	9925	Hair (also known as "Kil")	Türkiye	Hatay	Belen	KIL4	PV068420	Haplogroup A	Zühal Gündüz	2016-04-15	Sanger dideoxy sequencing
Capra	Capra hircus	9925	Hair (also known as "Kil")	Türkiye	Hatay	Belen	KIL5	PV068421	Haplogroup A	Zühal Gündüz	2016-04-15	Sanger dideoxy sequencing
Capra	Capra hircus	9925	Hair (also known as "Kil")	Türkiye	Hatay	Belen	KIL6	PV068422	Haplogroup A	Zühal Gündüz	2016-04-15	Sanger dideoxy sequencing
Capra	Capra hircus	9925	Hair (also known as "Kil")	Türkiye	Hatay	Belen	KIL7	PV068423	Haplogroup A	Zühal Gündüz	2016-04-15	Sanger dideoxy sequencing
Capra	Capra hircus	9925	Hair (also known as "Kil")	Türkiye	Hatay	Belen	KIL8	PV068424	Haplogroup A	Zühal Gündüz	2016-04-15	Sanger dideoxy sequencing
Capra	Capra hircus	9925	Hair (also known as "Kil")	Türkiye	Hatay	Belen	KIL9	PV068425	Haplogroup A	Zühal Gündüz	2016-04-15	Sanger dideoxy sequencing
Capra	Capra hircus	9925	Hair (also known as "Kil")	Türkiye	Hatay	Belen	KIL10	PV068426	Haplogroup A	Zühal Gündüz	2016-04-15	Sanger dideoxy sequencing
Capra	Capra hircus	9925	Hair (also known as "Kil")	Türkiye	Hatay	Belen	KIL11	PV068427	Haplogroup A	Zühal Gündüz	2016-04-15	Sanger dideoxy sequencing
Capra	Capra hircus	9925	Hair (also known as "Kil")	Türkiye	Hatay	Belen	KIL12	PV068428	Haplogroup A	Zühal Gündüz	2016-04-15	Sanger dideoxy sequencing
Capra	Capra hircus	9925	Hair (also known as "Kil")	Türkiye	Hatay	Belen	KIL13	PV068429	Haplogroup A	Zühal Gündüz	2016-04-15	Sanger dideoxy sequencing
Capra	Capra hircus	9925	Hair (also known as "Kil")	Türkiye	Hatay	Belen	KIL14	PV068430	Haplogroup A	Zühal Gündüz	2016-04-15	Sanger dideoxy sequencing
Capra	Capra hircus	9925	Hair (also known as "Kil")	Türkiye	Hatay	Belen	KIL15	PV068431	Haplogroup A	Zühal Gündüz	2016-04-15	Sanger dideoxy sequencing
Capra	Capra hircus	9925	Hair (also known as "Kil")	Türkiye	Hatay	Belen	KIL16	PV068432	Haplogroup A	Zühal Gündüz	2016-04-15	Sanger dideoxy sequencing
Capra	Capra hircus	9925	Hair (also known as "Kil")	Türkiye	Hatay	Belen	KIL17	PV068433	Haplogroup A	Zühal Gündüz	2016-04-15	Sanger dideoxy sequencing
Capra	Capra hircus	9925	Hair (also known as "Kil")	Türkiye	Hatay	Belen	KIL18	PV068434	Haplogroup A	Zühal Gündüz	2016-04-15	Sanger dideoxy sequencing
Capra	Capra hircus	9925	Hair (also known as "Kil")	Türkiye	Hatay	Belen	KIL19	PV068435	Haplogroup A	Zühal Gündüz	2016-04-15	Sanger dideoxy sequencing
Capra	Capra hircus	9925	Hair (also known as "Kil")	Türkiye	Hatay	Belen	KIL20	PV068436	Haplogroup A	Zühal Gündüz	2016-04-15	Sanger dideoxy sequencing
Capra	Capra hircus	9925	Hair (also known as "Kil")	Türkiye	Hatay	Belen	KIL21	PV068437	Haplogroup A	Zühal Gündüz	2016-04-15	Sanger dideoxy sequencing
Capra	Capra hircus	9925	Kilis	Türkiye	Kilis	Polateli	KLS1	PV068438	Haplogroup A	Zühal Gündüz	2016-04-27	Sanger dideoxy sequencing
Capra	Capra hircus	9925	Kilis	Türkiye	Kilis	Polateli	KLS2	PV068439	Haplogroup A	Zühal Gündüz	2016-04-27	Sanger dideoxy sequencing
Capra	Capra hircus	9925	Kilis	Türkiye	Kilis	Polateli	KLS3	PV068440	Haplogroup A	Zühal Gündüz	2016-04-27	Sanger dideoxy sequencing
Capra	Capra hircus	9925	Kilis	Türkiye	Kilis	Polateli	KLS4	PV068441	Haplogroup A	Zühal Gündüz	2016-04-27	Sanger dideoxy sequencing
Capra	Capra hircus	9925	Kilis	Türkiye	Kilis	Polateli	KLS6	PV068442	Haplogroup A	Zühal Gündüz	2016-04-27	Sanger dideoxy sequencing
Capra	Capra hircus	9925	Kilis	Türkiye	Kilis	Polateli	KLS7	PV068443	Haplogroup A	Zühal Gündüz	2016-04-27	Sanger dideoxy sequencing
Capra	Capra hircus	9925	Kilis	Türkiye	Kilis	Polateli	KLS8	PV068444	Haplogroup A	Zühal Gündüz	2016-04-27	Sanger dideoxy sequencing
Capra	Capra hircus	9925	Kilis	Türkiye	Kilis	Polateli	KLS9	PV068445	Haplogroup A	Zühal Gündüz	2016-04-27	Sanger dideoxy sequencing
Capra	Capra hircus	9925	Kilis	Türkiye	Kilis	Polateli	KLS10	PV068446	Haplogroup A	Zühal Gündüz	2016-04-27	Sanger dideoxy sequencing
Capra	Capra hircus	9925	Kilis	Türkiye	Kilis	Polateli	KLS11	PV068447	Haplogroup A	Zühal Gündüz	2016-04-27	Sanger dideoxy sequencing
Capra	Capra hircus	9925	Kilis	Türkiye	Kilis	Polateli	KLS12	PV068448	Haplogroup G	Zühal Gündüz	2016-04-27	Sanger dideoxy sequencing
Capra	Capra hircus	9925	Kilis	Türkiye	Kilis	Polateli	KLS13	PV068449	Haplogroup A	Zühal Gündüz	2016-04-27	Sanger dideoxy sequencing
Capra	Capra hircus	9925	Kilis	Türkiye	Kilis	Polateli	KLS14	PV068450	Haplogroup A	Zühal Gündüz	2016-04-27	Sanger dideoxy sequencing
Capra	Capra hircus	9925	Kilis	Türkiye	Kilis	Polateli	KLS15	PV068451	Haplogroup A	Zühal Gündüz	2016-04-27	Sanger dideoxy sequencing
Capra	Capra hircus	9925	Kilis	Türkiye	Kilis	Polateli	KLS16	PV068452	Haplogroup A	Zühal Gündüz	2016-04-27	Sanger dideoxy sequencing
Capra	Capra hircus	9925	Kilis	Türkiye	Kilis	Polateli	KLS17	PV068453	Haplogroup A	Zühal Gündüz	2016-04-27	Sanger dideoxy sequencing
Capra	Capra hircus	9925	Kilis	Türkiye	Kilis	Polateli	KLS18	PV068454	Haplogroup A	Zühal Gündüz	2016-04-27	Sanger dideoxy sequencing
Capra	Capra hircus	9925	Kilis	Türkiye	Kilis	Polateli	KLS19	PV068455	Haplogroup A	Zühal Gündüz	2016-04-27	Sanger dideoxy sequencing
Capra	Capra hircus	9925	Kilis	Türkiye	Kilis	Polateli	KLS20	PV068456	Haplogroup A	Zühal Gündüz	2016-04-27	Sanger dideoxy sequencing
Capra	Capra hircus	9925	Kilis	Türkiye	Kilis	Polateli	KLS21	PV068457	Haplogroup A	Zühal Gündüz	2016-04-27	Sanger dideoxy sequencing
Capra	Capra hircus	9925	Kilis	Türkiye	Kilis	Polateli	KLS22	PV068458	Haplogroup A	Zühal Gündüz	2016-04-27	Sanger dideoxy sequencing
