# Supplementary material for: Maternal haplotype diversity and phylogenetic relationships of Damascus, Kilis, Hatay, and Kil goat breeds: insight from mtDNA D-loop sequences in the Fertile Crescent
Source: Copernicus journal article supplement (doi:10.5194/aab-68-607-2025), 2025-10-22
Supplement: Supplementary file [file aab-68-607-2025-supplement-title-page.pdf › aab-68-607-2025-supplement-title-page.pdf]

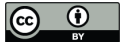

## *Supplement of*

# **Maternal haplotype diversity and phylogenetic relationships of Damascus, Kilis, Hatay, and Kil goat breeds: insight from mtDNA D-loop sequences in the Fertile Crescent**

**İsmail Karaköse and Zühal Gündüz**

*Correspondence to:* Zühal Gündüz ([zuhal.gunduz@adu.edu.tr](mailto:zuhal.gunduz@adu.edu.tr))

- [aab-68-607-2025-supplement-title-page.pdf](#)
- [Table S1\\_Supplementary data.xlsx](#)

The copyright of individual parts of the supplement might differ from the article licence.
